# Supplementary material for: Care Management for Serious Mental Illness: A Systematic Review and Meta-Analysis
Source: Atypon-hosted journal article supplement (doi:10.1176/appi.ps.202000473), 2021-07-13
Supplement: appi.ps.202000473.ds001.pdf [file appi.ps.202000473.ds001.pdf]

Supplemental Appendix 1. Sample search

MEDLINE search: (care manag\*[tiab] OR "Case Management"[Mesh] OR case manag\*[tiab] OR care coordinat\*[tiab] OR case coordinat\*[tiab] OR patient coordinat\*[tiab] OR care facilitat\*[tiab] OR patient facilitat\*[tiab] OR care navigat\*[tiab] OR patient navigat\*[tiab] OR health coach\*[tiab] OR care partner\*[tiab]) AND ("Bipolar and Related Disorders"[Mesh] OR "Schizophrenia Spectrum and Other Psychotic Disorders"[Mesh] OR schizophreni\*[tiab] OR schizophreniform[tiab] OR schizoaffective[tiab] OR bipolar[tiab] OR serious mental illness\*[tiab] OR seriously mentally ill[tiab])

## Supplemental Appendix 2. Quality assessment: Methodology

1. Representativeness: 1 point for a multi-center study, screening in at least 90% schizophrenia/schizoaffective/schizophreniform or bipolar disorder, and addressing a general outpatient population; 0 point if a single-center study, screening <90% schizophrenia or bipolar disorder, or otherwise limited to a sub-population.
2. Response bias: 1 point for comparability established between respondents and non-respondents, or a response rate of at least 90%; 0 point for lack of comparability established and a response rate of <90%, or response data not reported.
3. Appropriateness of design: 1 point for a randomized study with clear randomization protocol; 0 point if not meeting the above criteria.
4. Ascertainment of exposure and non-contamination: 1 point for explicit evidence of complete exposure to intervention, documentation of contamination rate, and at least 80% non-contaminated intervention completion; 0 point if no explicit documentation of exposure completion or contamination rate or <80% intervention completion.
5. Planned follow-up duration: 1 point for a follow-up duration of at least 1 year; 0 point if less than 1 year.
6. Follow-up rate: 1 point for either a) a follow-up completion rate of at least 80%, if the longest follow-up duration is <1 year, or b) a 1-year follow-up rate of at least 80% across all participants; 0 point otherwise.
7. Outcome assessment: Assessed for each category of outcome assessed by the study; total score for this domain is average of the below, excluding categories that are not applicable.  
Psychiatric symptoms: 1 point for use of at least one well-described or validated tool (i.e., described in a peer-reviewed journal); 0 point for a poorly described or non-validated tool.

General medical health: 1 point for use of at least one well-described or validated tool (i.e., described in a peer-reviewed journal); 0 point for a poorly described or non-validated tool.

Mental QOL: 1 point for use of at least one well-described or validated tool (i.e., described in a peer-reviewed journal); 0 point for a poorly described or non-validated tool.

Physical QOL: 1 point for use of at least one well-described or validated tool (i.e., described in a peer-reviewed journal); 0 point for a poorly described or non-validated tool.

Global QOL: 1 point for use of at least one well-described or validated tool (i.e., described in a peer-reviewed journal); 0 point for a poorly described or non-validated tool.

Patient satisfaction: 1 point for use of at least one well-described or validated tool (i.e., described in a peer-reviewed journal); 0 point for a poorly described or non-validated tool.

Cost: 1 point for a clearly defined and holistic cost metric inclusive of the cost of the intervention; 0 point for a poorly defined metric or a metric not inclusive of the cost of the intervention.

Acute care utilization: 1 point for use of total inpatient days, number of inpatient hospitalizations, or number of emergency department visits, from a comprehensive regional/national database; 0 point otherwise.

Supplemental Figure 1. PRISMA diagram

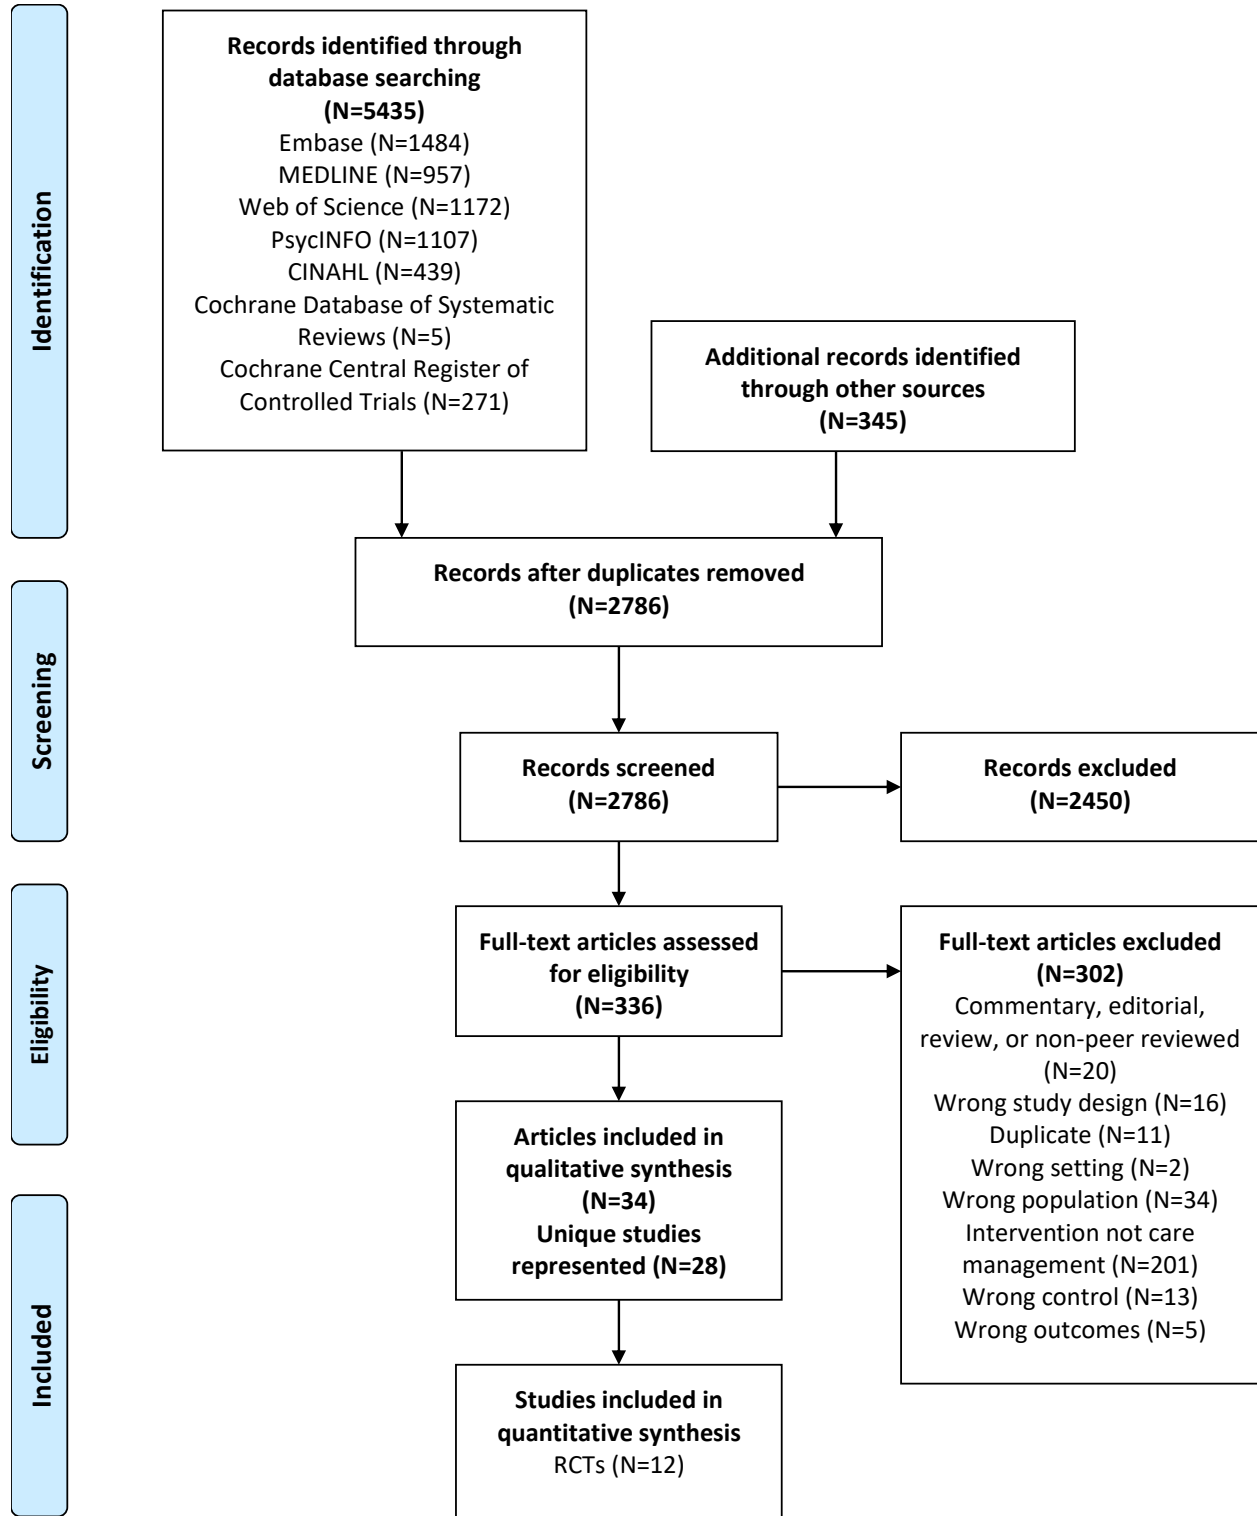

Supplemental Table 1. Study, subject, intervention, and control characteristics

| Study                   | Study design | # sites  | Country | Setting                                                                                      | N for study | % Schizophrenia | % Bipolar | % serious mental illness unspecified | % Non-serious mental illness | % Female | Average age |
|-------------------------|--------------|----------|---------|----------------------------------------------------------------------------------------------|-------------|-----------------|-----------|--------------------------------------|------------------------------|----------|-------------|
| Bjorkman 2002<br>(28)   | RCT          | 1        | Sweden  | Urban community setting in Sweden                                                            | 77          | 71%             | 0%        | 0%                                   | 29%                          | 53%      | 37.1        |
| Chatterjee 2014<br>(21) | RCT          | 3        | India   | Three districts in India with rural and urban populations                                    | 282         | 100%            | 0%        | 0%                                   | 0%                           | 47%      | 36.0        |
| Gelkopf 2016<br>(29)    | RCT          | Multiple | Israel  | Central and northern regions of Israel; public system of psychiatric rehabilitation services | 1729        | 45%             | 0%        | 0%                                   | 55%                          | 40%      | N/A         |
| Kilbourne 2012<br>(20)  | RCT          | 2        | U.S.    | Two community-based mental health outpatient programs in southeastern Michigan               | 65          | 0%              | 100%      | 0%                                   | 0%                           | 60%      | 45.3        |

|                                          |     |          |               |                                                                                                                               |     |     |     |    |     |     |      |
|------------------------------------------|-----|----------|---------------|-------------------------------------------------------------------------------------------------------------------------------|-----|-----|-----|----|-----|-----|------|
| Kilbourne 2013<br>(30)                   | RCT | 2        | United States | Veterans Affairs mental health outpatient clinic in southeastern Michigan and primary care outpatient clinic in northern Ohio | 118 | 3%  | 97% | 0% | 0%  | 17% | 52.8 |
| Litchenberg<br>2008 (31)                 | RCT | 20       | Israel        | Six communities across central and southern Israel; initiated implemented by Israel's Ministry of Health                      | 217 | 73% | 0%  | 0% | 27% | 41% | N/A  |
| Malakouti 2016<br>(32)                   | RCT | 4        | Iran          | Four psychiatric centers in Iran, urban setting; implemented by Mental Health Bureau and Iranian Ministry of Health           | 121 | 35% | 65% | 0% | 0%  | 43% | 38.6 |
| Marshall 1995 /<br>Gray 1997 (33,<br>34) | RCT | Multiple | UK            | Oxford, recruiting homeless individuals                                                                                       | 80  | 74% | 0%  | 0% | 26% | 15% | N/A  |

|                                            |                         |   |               |                                                                                                  |     |      |      |    |     |     |      |
|--------------------------------------------|-------------------------|---|---------------|--------------------------------------------------------------------------------------------------|-----|------|------|----|-----|-----|------|
| Puschner 2011<br>(35)                      | RCT                     | 5 | Germany       | University psychiatric inpatient services across five urban and rural catchment areas in Germany | 491 | 59%  | 0%   | 0% | 41% | 48% | 41.3 |
| Simon 2005 /<br>Simon 2006 (36,<br>37)     | RCT                     | 4 | United States | Four group-model behavioral health clinics in managed care organization in Washington State      | 441 | 0%   | 100% | 0% | 0%  | 68% | 44.2 |
| Speyer 2016 /<br>Jakobsen 2017<br>(38, 39) | RCT                     | 2 | Denmark       | Two major Danish cities, Aarhus and Copenhagen                                                   | 290 | 100% | 0%   | 0% | 0%  | 56% | 39.0 |
| Varga 2018 (40)                            | RCT                     | 2 | Hungary       | Urban community setting in Pécs, Hungary                                                         | 49  | 100% | 0%   | 0% | 0%  | 49% | 38.6 |
| Alonso Suarez<br>2011 (41)                 | Time-series<br>analysis | 3 | Spain         | Three community mental health services in three districts of                                     | 250 | 100% | 0%   | 0% | 0%  | 36% | 34   |

|                                        |                      |          |             |                                                                                     |     |     |    |                      |     |     |      |  |
|----------------------------------------|----------------------|----------|-------------|-------------------------------------------------------------------------------------|-----|-----|----|----------------------|-----|-----|------|--|
|                                        |                      |          |             | Spain (Alcalá, Torrejón, Fuencarral)                                                |     |     |    |                      |     |     |      |  |
| Balsera Gomez 2002 (42)                | Time-series analysis | Multiple | Spain       | Two healthcare sectors of Catalonia, Spain (Gavà and Sants-Montjuic)                | 30  | 90% | 0% | 0%                   | 10% | 40% | 40   |  |
| Bjorkman 2000 / Bjorkman 2007 (43, 44) | Time-series analysis | 10       | Sweden      | Ten urban community settings in Sweden                                              | 176 | 72% | 0% | 0%                   | 28% | 47% | 41   |  |
| Cabassa 2016 (45)                      | Time-series analysis | 1        | U.S.        | Public outpatient mental health clinic in Manhattan                                 | 34  |     |    | Majority of subjects |     | 68% | 54.1 |  |
| Huguelet 1997 (46)                     | Time-series analysis | 1        | Switzerland | Outpatient system in Jonction area of University of Geneva Department of Psychiatry | 59  | 86% | 0% | 0%                   | 14% | 25% | 35   |  |



|                                   |                         |    |       |                                                                                                                                                                                |     |      |     |      |     |     |      |
|-----------------------------------|-------------------------|----|-------|--------------------------------------------------------------------------------------------------------------------------------------------------------------------------------|-----|------|-----|------|-----|-----|------|
| Karper 2008<br>(47)               | Prospective<br>cohort   | 1  | U.S.  | Homeless shelter with substance<br>use treatment in Pennsylvania                                                                                                               | 75  | 17%  | 37% | 0%   | 45% | 0%  | 38.7 |
| Maples 2012<br>(48)               | Non-RCT                 | 2  | U.S.  | Two clinics in Bexar County,<br>Texas; one clinic served as<br>intervention site, other clinic<br>served as control; recruitment<br>from two private and one state<br>hospital | 670 | 0%   | 0%  | 100% | 0%  | 40% | 37.0 |
| Mas-Exposito<br>2015 (49)         | Prospective<br>cohort   | 10 | Spain | Ten adult mental health centers<br>in Barcelona, Spain; program<br>set up by Catalan Health<br>Department                                                                      | 163 | 100% | 0%  | 0%   | 0%  | 32% | 41.7 |
| Sendra-<br>Gutierrez 2013<br>(50) | Retrospective<br>cohort | 1  | Spain | Mental health center and<br>hospital in Segovia, Spain, with<br>rural and urban population                                                                                     | 92  | 100% | 0%  | 0%   | 0%  | 35% | 48.7 |

|                    |                      |          |              |                                                                                                                                                                            |      |                      |    |    |     |     |     |     |
|--------------------|----------------------|----------|--------------|----------------------------------------------------------------------------------------------------------------------------------------------------------------------------|------|----------------------|----|----|-----|-----|-----|-----|
| Uys 1996 (51)      | Non-RCT              | 1        | South Africa | Two clinics in rural area of KwaZulu-Natal, near Ulundi, South Africa; one clinic served as source of intervention group, another clinic served as source of control group | 41   | Majority of subjects |    |    |     |     | 44% | N/A |
| Franklin 1987 (52) | RCT                  | 1        | U.S.         | Catchment area of a community mental health center in Texas                                                                                                                | 417  | 56%                  | 0% | 0% | 44% | 51% | N/A |     |
| Goering 1988 (53)  | Prospective cohort   | 4        | Canada       | Toronto metropolitan area, psychiatric aftercare                                                                                                                           | 184  | 77%                  | 0% | 0% | 23% | 57% | N/A |     |
| Macias 1997 (54)   | Prospective cohort   | 1        | U.S.         | Private non-for-profit mental health agency for Medicaid enrollees in Salt Lake City                                                                                       | 97   | 60%                  | 0% | 0% | 40% | 45% | 40  |     |
| Parks 2010 (55)    | Retrospective cohort | Multiple | U.S.         | Missouri Medicaid program                                                                                                                                                  | 6061 | 100%                 | 0% | 0% | 0%  | N/A | N/A |     |

|                                         |                         |   |         |                                                                                                             |     |     |    |    |     |     |      |
|-----------------------------------------|-------------------------|---|---------|-------------------------------------------------------------------------------------------------------------|-----|-----|----|----|-----|-----|------|
| Rossler 1992<br>(56)                    | Retrospective<br>cohort | 4 | Germany | 4 catchment areas in the<br>German federal state of Baden-<br>Württemberg                                   | 324 | 59% | 0% | 0% | 41% | 55% | N/A  |
| Tomita 2012 /<br>2014 / 2015<br>(57–59) | RCT                     | 2 | U.S.    | Discharge from transitional<br>residences on grounds of<br>psychiatric hospital in NYC<br>metropolitan area | 150 | 96% | 0% | 0% | 4%  | 29% | 37.5 |

| Study                 | Intervention:<br>Clinician vs.<br>Non-<br>Clinician | Intervention explicitly involves social service coordination (Y/N) | Intervention explicitly involves direct care provision (Y/N) | Care manager is embedded within outpatient psychiatric team (Y/N) | Intervention explicitly involves medical/physical health component (Y/N) | Intervention: caseload (number of patients per care manager FTE) | Duration of intervention: planned (in months) | Control                                                                      |
|-----------------------|-----------------------------------------------------|--------------------------------------------------------------------|--------------------------------------------------------------|-------------------------------------------------------------------|--------------------------------------------------------------------------|------------------------------------------------------------------|-----------------------------------------------|------------------------------------------------------------------------------|
| Bjorkman 2002<br>(28) | Clinician                                           | Y                                                                  | N                                                            | N                                                                 | N                                                                        | 8.3                                                              | 36                                            | Psychiatric services including outpatient, inpatient, and daycare facilities |

|                          |           |   |   |   |   |     |    |                                                                                                                                                                                                                       |
|--------------------------|-----------|---|---|---|---|-----|----|-----------------------------------------------------------------------------------------------------------------------------------------------------------------------------------------------------------------------|
| Chatterjee 2014<br>(21)  | Clinician | Y | Y | N | N | N/A | 12 | Facility-based care provided by specialist mental health practitioners, including psychiatrists                                                                                                                       |
| Gelkopf 2016<br>(29)     | Clinician | Y | Y | N | N | N/A | 20 | Psychiatric Rehabilitation Services, provided by trained mental health professionals                                                                                                                                  |
| Kilbourne 2012<br>(20)   | Clinician | N | Y | N | Y | N/A | 6  | Community-based mental health outpatient care plus monthly mailings on wellness topics and referral to off-site primary care services                                                                                 |
| Kilbourne 2013<br>(30)   | Clinician | N | Y | N | Y | 29  | 12 | Standard mental healthcare and medical treatment plus regular mailings regarding wellness topics and provision of practice guideline information to general medical and mental health providers at beginning of study |
| Litchenberg<br>2008 (31) | Clinician | Y | Y | Y | N | 30  | 12 | Standard mental health care, including monthly meeting with psychiatrist, meeting every 2 weeks with nurse, and access to a social worker as needed                                                                   |

|                                            |           |   |   |   |   |     |    |                                                                                         |
|--------------------------------------------|-----------|---|---|---|---|-----|----|-----------------------------------------------------------------------------------------|
| Malakouti 2016<br>(32)                     | Clinician | N | Y | N | N | 20  | 12 | Care by family and outpatient clinic, typically medication prescription by psychiatrist |
| Marshall 1995 /<br>Gray 1997 (33,<br>34)   | N/A       | Y | N | N | N | N/A | 14 | Any assistance subjects had been receiving prior to randomization                       |
| Puschner 2011<br>(35)                      | N/A       | N | N | N | N | N/A | 3  | Treatment as usual in outpatient services                                               |
| Simon 2005 /<br>Simon 2006 (36,<br>37)     | Clinician | N | Y | N | N | 95  | 24 | Usual care at group-model behavioral health clinic                                      |
| Speyer 2016 /<br>Jakobsen 2017<br>(38, 39) | Clinician | N | Y | N | Y | 35  | 12 | Usual care with general practitioner and secondary mental health services               |
| Varga 2018 (40)                            | N/A       | N | N | N | N | N/A | 6  | Antipsychotic psychopharmacology and monthly consultations with psychiatrist            |

|                                              |           |   |   |   |   |      |    |                                                                                                                                                         |
|----------------------------------------------|-----------|---|---|---|---|------|----|---------------------------------------------------------------------------------------------------------------------------------------------------------|
| Alonso Suarez<br>2011 (41)                   | Clinician | Y | Y | Y | N | 32.5 | 48 | Multidisciplinary care including psychiatrist,<br>psychologist, nurse, social worker                                                                    |
| Balsera Gomez<br>2002 (42)                   | N/A       | Y | N | N | N | 15   | 12 | Mental health services in two sectors of<br>Catalonia                                                                                                   |
| Bjorkman 2000<br>/ Bjorkman<br>2007 (43, 44) | Clinician | Y | N | N | N | 5.7  | 72 | Psychiatric services in Sweden                                                                                                                          |
| Cabassa 2016<br>(45)                         | Clinician | N | Y | N | Y | 14.5 | 12 | Public outpatient mental health clinic care                                                                                                             |
| Huguelet 1997<br>(46)                        | Clinician | Y | Y | Y | N | 17   | 12 | Outpatient care through University of Geneva<br>Department of Psychiatry                                                                                |
| Karper 2008<br>(47)                          | Clinician | N | N | N | N | N/A  | 12 | Substance abuse treatment through Allentown<br>Rescue Mission shelter and outpatient care<br>through Lehigh Valley Hospital Department of<br>Psychiatry |

|                                   |                                |   |   |     |   |      |    |                                                                                                     |
|-----------------------------------|--------------------------------|---|---|-----|---|------|----|-----------------------------------------------------------------------------------------------------|
| Maples 2012<br>(48)               | Clinician and<br>non-clinician | N | Y | Y   | N | N/A  | 6  | Outpatient mental health care at Center for<br>Health Care Services clinic                          |
| Mas-Exposito<br>2015 (49)         | Clinician                      | N | Y | Y   | N | N/A  | 12 | Adult mental health center care                                                                     |
| Sendra-<br>Gutierrez 2013<br>(50) | Clinician                      | Y | Y | N/A | N | N/A  | 24 | Outpatient care in the Mental Health Center<br>"Antonio Machado"                                    |
| Uys 1996 (51)                     | Clinician                      | Y | Y | Y   | N | 8    | 6  | Outpatient mental health clinic                                                                     |
| Franklin 1987<br>(52)             | Clinician and<br>non-clinician | Y | N | N   | N | 30   | 12 | Care at a community mental health center in<br>Texas                                                |
| Goering 1988<br>(53)              | Clinician and<br>non-clinician | Y | N | N   | N | 17.5 | 24 | Matched by sex, hospital setting, number of<br>previous admissions, diagnosis, employment<br>status |
| Macias 1997<br>(54)               | Clinician                      | Y | N | N   | N | 16   | 9  | Inpatient and outpatient care, as well as clinic<br>and off-site services                           |



|                                   |               |   |   |   |   |      |    |                                                                                                                              |
|-----------------------------------|---------------|---|---|---|---|------|----|------------------------------------------------------------------------------------------------------------------------------|
| Parks 2010 (55)                   | Non-clinician | Y | Y | N | N | N/A  | 12 | Population not receiving case management program                                                                             |
| Rossler 1992 (56)                 | Clinician     | Y | Y | N | N | 10.1 | 6  | Well-developed psychiatric care system with general practitioners and psychiatrists                                          |
| Tomita 2012 / 2014 / 2015 (57–59) | Non-clinician | Y | N | N | N | N/A  | 9  | Discharge planning services and access to psychiatric treatment while in residential setting; usual community-based services |

Supplemental Table 2. Qualitative summary of outcomes by study (+I: intervention cohort favored; +C: control cohort favored; NS: no significant difference)

| Study                              | Study design | Psychiatric symptoms | Physical QOL | Mental QOL | Global QOL | Patient satisfaction | Healthcare costs | Inpatient hospitalizations | Inpatient days | Emergency department visits |
|------------------------------------|--------------|----------------------|--------------|------------|------------|----------------------|------------------|----------------------------|----------------|-----------------------------|
| Bjorkman 2002 (28)                 | RCT          | NS                   |              |            | NS         | +I                   |                  |                            | NS             |                             |
| Chatterjee 2014 (21)               | RCT          | +I                   |              |            |            |                      | +C               |                            |                |                             |
| Gelkopf 2016 (29)                  | RCT          | NS                   |              |            | +I         |                      |                  |                            |                |                             |
| Kilbourne 2012 (20)                | RCT          | NS                   | NS           | NS         |            |                      |                  |                            |                | NS                          |
| Kilbourne 2013 (30)                | RCT          | NS                   | NS           | NS         |            |                      |                  |                            |                |                             |
| Litchenberg 2008 (31)              | RCT          |                      |              |            |            |                      |                  | NS                         | NS             |                             |
| Malakouti 2016 (32)                | RCT          | +I                   |              | +I         |            | +I                   |                  |                            |                |                             |
| Marshall 1995 / Gray 1997 (33, 34) | RCT          | NS                   |              |            | NS         |                      | +C               |                            |                |                             |
| Puschner 2011 (35)                 | RCT          | NS                   |              |            | NS         |                      |                  | NS                         | NS             |                             |

|                                        |                      |    |    |    |    |  |  |    |    |    |
|----------------------------------------|----------------------|----|----|----|----|--|--|----|----|----|
| Simon 2005 / Simon 2006 (36, 37)       | RCT                  | NS |    |    |    |  |  |    | NS |    |
| Speyer 2016 / Jakobsen 2017 (38, 39)   | RCT                  | +I |    |    | NS |  |  |    |    |    |
| Varga 2018 (40)                        | RCT                  | NS |    |    |    |  |  |    |    |    |
| Alonso Suarez 2011 (41)                | Time-series analysis |    |    |    |    |  |  | +I | +I | NS |
| Balsera Gomez 2002 (42)                | Time-series analysis | +I |    |    |    |  |  | +I | NS |    |
| Bjorkman 2000 / Bjorkman 2007 (43, 44) | Time-series analysis | +I | +C | +I | +I |  |  | +I | +I |    |
| Cabassa 2016 (45)                      | Time-series analysis |    | NS | NS |    |  |  |    |    |    |

|                            |                      |    |    |    |    |  |    |    |    |    |
|----------------------------|----------------------|----|----|----|----|--|----|----|----|----|
| Huguelet 1997 (46)         | Time-series analysis | +I |    |    |    |  |    |    |    |    |
| Karper 2008 (47)           | Prospective cohort   | NS |    |    |    |  |    |    |    |    |
| Maples 2012 (48)           | Non-RCT              |    |    |    |    |  |    | +C | NS |    |
| Mas-Exposito 2015 (49)     | Prospective cohort   |    | NS | NS | NS |  |    | NS | NS | NS |
| Sendra-Gutierrez 2013 (50) | Retrospective cohort |    |    |    |    |  |    | NS |    |    |
| Uys 1996 (51)              | Non-RCT              | NS |    |    |    |  |    |    |    |    |
| Franklin 1987 (52)         | RCT                  |    |    |    |    |  | NS | NS | NS | NS |
| Goering 1988 (53)          | Prospective cohort   |    |    |    |    |  |    | NS |    |    |
| Macias 1997 (54)           | Prospective cohort   | NS |    |    |    |  |    |    |    |    |



Supplemental Table 3. Scales used

| Study                   | Psychiatric symptoms                                  | Mental QOL | Physical QOL | Global QOL                                                                     | Patient satisfaction                                                                               |
|-------------------------|-------------------------------------------------------|------------|--------------|--------------------------------------------------------------------------------|----------------------------------------------------------------------------------------------------|
| Bjorkman<br>2002 (28)   | Symptom<br>Checklist-90<br>(SCL-90)                   |            |              | Lancashire<br>Quality of Life<br>Profile<br>(LQOLP)                            | Swedish<br>Institute for<br>Health<br>Services<br>Development<br>patient<br>satisfaction<br>(SPRI) |
| Chatterjee<br>2014 (21) | Positive and<br>Negative<br>Syndrome<br>Scale (PANSS) |            |              |                                                                                |                                                                                                    |
| Gelkopf 2016<br>(29)    | Colorado<br>Symptom<br>Index (CSI)                    |            |              | Modified<br>Manchester<br>Short<br>Assessment of<br>Quality of Life<br>(MANSA) |                                                                                                    |

|                                          |                                                       |                                                  |                                                       |                                                                    |                                                  |
|------------------------------------------|-------------------------------------------------------|--------------------------------------------------|-------------------------------------------------------|--------------------------------------------------------------------|--------------------------------------------------|
| Kilbourne<br>2012 (20)                   | Internal State<br>Scale (ISS) -<br>Manic<br>Symptoms  | 12-item Short<br>Form (SF-12) -<br>Mental Health | 12-item Short<br>Form (SF-12) -<br>Physical<br>Health |                                                                    |                                                  |
| Kilbourne<br>2013 (30)                   | Internal State<br>Scale (ISS) -<br>Manic<br>Symptoms  | 12-item Short<br>Form (SF-12) -<br>Mental Health | 12-item Short<br>Form (SF-12) -<br>Physical<br>Health |                                                                    |                                                  |
| Litchenberg<br>2008 (31)                 |                                                       |                                                  |                                                       |                                                                    |                                                  |
| Malakouti<br>2016 (32)                   | Positive and<br>Negative<br>Syndrome<br>Scale (PANSS) | 36-item Short<br>Form (SF-36) -<br>Mental Health |                                                       |                                                                    | Client<br>Questionnaire<br>Satisfaction<br>(CQS) |
| Marshall 1995<br>/ Gray 1997<br>(33, 34) | Manchester<br>Scale                                   |                                                  |                                                       | The Quality of<br>Life Interview                                   |                                                  |
| Puschner 2011<br>(35)                    | Brief<br>Psychiatric<br>Rating Scale<br>(BPRS)        |                                                  |                                                       | Manchester<br>Short<br>Assessment of<br>Quality of Life<br>(MANSA) |                                                  |

|                                            |                                                               |  |  |                                                                    |  |
|--------------------------------------------|---------------------------------------------------------------|--|--|--------------------------------------------------------------------|--|
| Simon 2005 /<br>Simon 2006<br>(36, 37)     | 6-point<br>Psychiatric<br>Status Rating<br>(PSR) for<br>Mania |  |  |                                                                    |  |
| Speyer 2016 /<br>Jakobsen 2017<br>(38, 39) | Scale for<br>Assessment of<br>Positive<br>Symptoms<br>(SAPS)  |  |  | Manchester<br>Short<br>Assessment of<br>Quality of Life<br>(MANSA) |  |
| Varga 2018<br>(40)                         | Positive and<br>Negative<br>Syndrome<br>Scale (PANSS)         |  |  |                                                                    |  |



## Supplemental Figure 2. Meta-analysis

### Psychiatric symptoms

| Study                                           | Effect size (95% CI) | p-value |
|-------------------------------------------------|----------------------|---------|
| Bjorkman 2002 (28)                              | 0.04 (-0.47, 0.54)   | 0.89    |
| Chatterjee 2014 (21)                            | 0.29 (0.03, 0.55)    | 0.03    |
| Gelkopf 2016 (29)                               | -0.08 (-0.19, 0.03)  | 0.15    |
| Kilbourne 2012 (20)                             | -0.20 (-0.68, 0.28)  | 0.42    |
| Kilbourne 2013 (30)                             | 0.41 (-0.06, 0.87)   | 0.09    |
| Malakouti 2016 (32)                             | 0.64 (0.27, 1.00)    | 0.001   |
| Marshall 1995 (33) / Gray 1997 (34)             | -0.12 (-0.58, 0.34)  | 0.60    |
| Puschner 2011 (35)                              | 0.13 (-0.08, 0.33)   | 0.23    |
| Simon 2005 (36) / Simon 2006 (37)               | 0.08 (-0.12, 0.29)   | 0.43    |
| Speyer 2016 (38) / Jakobsen 2017 (39)           | 0.25 (0.01, 0.48)    | 0.04    |
| Varga 2018 (40)                                 | 0.43 (-0.13, 0.98)   | 0.14    |
| Meta-analysis (I-squared=63.4; Q=27.3; p=0.002) | 0.15 (0.01, 0.30)    | 0.03    |

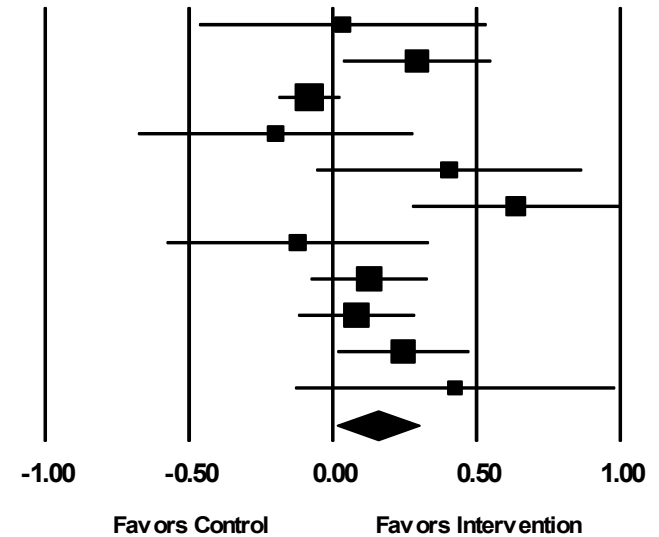

## Mental QOL

### Study

Kilbourne 2012 (20)  
Kilbourne 2013 (30)  
Malakouti 2016 (32)  
Meta-analysis (I-squared=0.0; Q=1.8; p=0.41)

### Effect size (95% CI)

0.27 (-0.21, 0.75)  
0.01 (-0.45, 0.47)  
0.41 (0.05, 0.77)  
0.26 (0.02, 0.51)

### p-value

0.27  
0.96  
0.03  
0.04

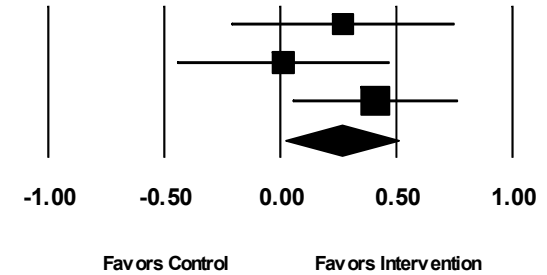

## Physical QOL

### Study

Kilbourne 2012 (20)  
Kilbourne 2013 (30)  
Meta-analysis (I-squared=67.4; Q=3.1; p=0.08)

### Effect size (95% CI)

0.45 (-0.04, 0.94)  
-0.15 (-0.61, 0.31)  
0.14 (-0.44, 0.73)

### p-value

0.07  
0.52  
0.63

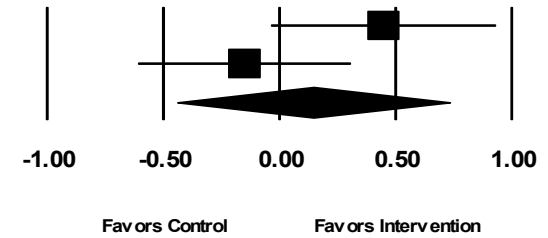

## Global QOL

### Study

Bjorkman 2002 (28)  
 Gelkopf 2016 (29)  
 Marshall 1995 (33) / Gray 1997 (34)  
 Puschner 2011 (35)  
 Speyer 2016 (38) / Jakobsen 2017 (39)  
 Meta-analysis (I-squared=0.0; Q=3.5; p=0.48)

### Effect size (95% CI)

-0.15 (-0.64, 0.34)  
 0.19 (0.08, 0.30)  
 0.11 (-0.39, 0.61)  
 0.11 (-0.10, 0.32)  
 0.00 (-0.23, 0.23)  
 0.13 (0.05, 0.22)

### p-value

0.56  
 0.001  
 0.66  
 0.29  
 1.00  
 0.002

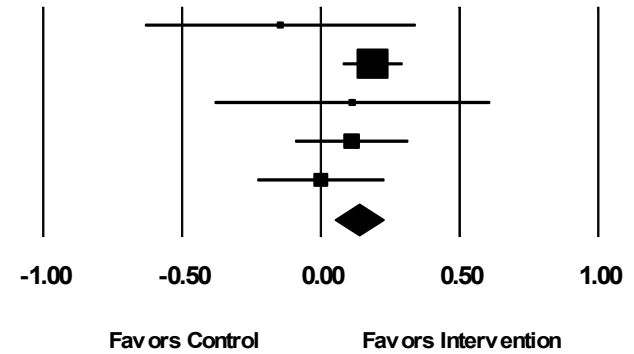

## Patient satisfaction

### Study

Bjorkman 2002 (28)  
 Malakouti 2016 (32)  
 Meta-analysis (I-squared=0.0; Q=0.6; p=0.43)

### Effect size (95% CI)

0.75 (0.23, 1.27)  
 1.01 (0.63, 1.38)  
 0.92 (0.61, 1.22)

### p-value

0.005  
 <0.001  
 <0.001

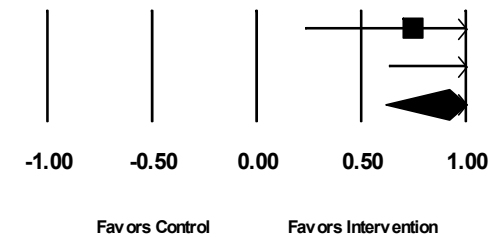

## Healthcare costs

### Study

Chatterjee 2014 (21)  
 Marshall 1995 (33) / Gray 1997 (34)  
 Meta-analysis (I-squared=87.1; Q=7.7; p=0.005)

### Effect size (95% CI)

-0.66 (-0.93, -0.39)  
 -1.55 (-2.11, -0.98)  
 -1.07 (-1.93, -0.20)

### p-value

<0.001  
 <0.001  
 0.02

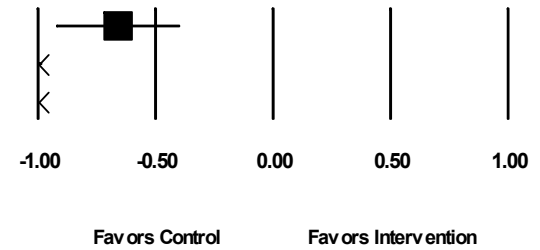

## Number of inpatient psychiatric hospitalizations

### Study

Litchenberg 2008 (31)  
 Puschner 2011 (35)  
 Meta-analysis (I-squared=0.0; Q=0.3; p=0.58)

### Effect size (95% CI)

0.13 (-0.14, 0.40)  
 0.03 (-0.19, 0.25)  
 0.07 (-0.10, 0.24)

### p-value

0.34  
 0.78  
 0.41

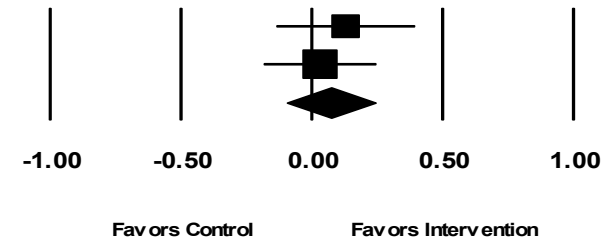

# Number of inpatient psychiatric hospital days

## Study

Bjorkman 2002 (28)  
Litchenberg 2008 (31)  
Puschner 2011 (35)  
Simon 2005 (36) / Simon 2006 (37)  
Meta-analysis (I-squared=0.0; Q=1.9; p=0.59)

## Effect size (95% CI)

0.37 (-0.08, 0.82)  
0.24 (-0.03, 0.51)  
0.15 (-0.07, 0.37)  
0.07 (-0.15, 0.28)  
0.16 (0.03, 0.29)

## p-value

0.10  
0.08  
0.18  
0.54  
0.02

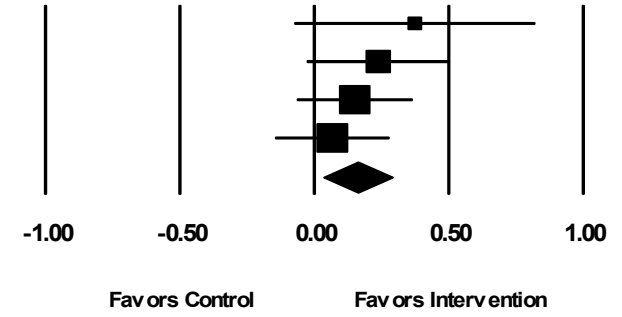

Supplemental Table 4. Quality assessment: Results

| Study                    | 1. Representativeness | 2. Response bias | 3. Appropriateness of design | 4. Exposure and non-contamination | 5. Planned follow-up | 6. Follow-up rate | 7. Outcomes assessment | Psychiatric symptoms | Mental QOL | Physical QOL | Global QOL | Patient satisfaction | Cost | Acute care utilization | Total score |
|--------------------------|-----------------------|------------------|------------------------------|-----------------------------------|----------------------|-------------------|------------------------|----------------------|------------|--------------|------------|----------------------|------|------------------------|-------------|
| Bjorkman<br>2002 (28)    | 0                     | 0                | 1                            | 0                                 | 1                    | 0                 | 1                      | 1                    | --         | --           | 1          | 1                    | --   | 1                      | 3           |
| Chatterjee<br>2014 (21)  | 1                     | 0                | 1                            | 0                                 | 1                    | 1                 | 1                      | 1                    | --         | --           | --         | --                   | 1    | --                     | 5           |
| Gelkopf<br>2016 (29)     | 0                     | 0                | 1                            | 1                                 | 1                    | 1                 | 1                      | 1                    | --         | --           | 1          | --                   | --   | --                     | 5           |
| Kilbourne<br>2012 (20)   | 1                     | 1                | 1                            | 0                                 | 1                    | 1                 | 1                      | 1                    | 1          | 1            | --         | --                   | --   | 1                      | 6           |
| Kilbourne<br>2013 (30)   | 0                     | 0                | 1                            | 0                                 | 1                    | 0                 | 1                      | 1                    | 1          | 1            | --         | --                   | --   | --                     | 3           |
| Litchenberg<br>2008 (31) | 0                     | 0                | 1                            | 0                                 | 1                    | 1                 | 1                      | --                   | --         | --           | --         | --                   | --   | 1                      | 4           |
| Malakouti<br>2016 (32)   | 1                     | 0                | 1                            | 0                                 | 1                    | 1                 | 1                      | 1                    | 1          | --           | --         | 1                    | --   | --                     | 5           |

|                                                  |   |   |   |   |   |   |   |    |    |    |    |    |    |    |   |
|--------------------------------------------------|---|---|---|---|---|---|---|----|----|----|----|----|----|----|---|
| Marshall<br>1995 / Gray<br>1997 (33,<br>34)      | 0 | 0 | 1 | 0 | 1 | 0 | 1 | 1  | -- | -- | 1  | -- | 1  | -- | 3 |
| Puschner<br>2011 (35)                            | 0 | 0 | 1 | 0 | 1 | 0 | 1 | 1  | -- | -- | 1  | -- | -- | 1  | 3 |
| Simon<br>2005 /<br>Simon<br>2006 (36,<br>37)     | 1 | 1 | 1 | 0 | 1 | 0 | 1 | 1  | -- | -- | -- | -- | -- | 1  | 5 |
| Speyer<br>2016 /<br>Jakobsen<br>2017 (38,<br>39) | 1 | 1 | 1 | 0 | 1 | 1 | 1 | 1  | -- | -- | 1  | -- | -- | -- | 6 |
| Varga 2018<br>(40)                               | 1 | 0 | 0 | 0 | 0 | 1 | 1 | 1  | -- | -- | -- | -- | -- | -- | 3 |
| Alonso<br>Suarez<br>2011 (41)                    | 1 | 0 | 0 | 0 | 1 | 1 | 1 | -- | -- | -- | -- | -- | -- | 1  | 4 |

|                                                    |   |   |   |   |   |   |   |    |    |    |    |    |    |    |   |
|----------------------------------------------------|---|---|---|---|---|---|---|----|----|----|----|----|----|----|---|
| Balsera<br>Gomez<br>2002 (42)                      | 1 | 0 | 0 | 0 | 1 | 1 | 1 | 1  | -- | -- | -- | -- | -- | 1  | 4 |
| Bjorkman<br>2000 /<br>Bjorkman<br>2007 (43,<br>44) | 0 | 0 | 0 | 0 | 1 | 0 | 1 | 1  | 1  | 1  | 1  | -- | -- | 1  | 2 |
| Cabassa<br>2016 (45)                               | 0 | 0 | 0 | 0 | 1 | 1 | 1 | -- | 1  | 1  | -- | -- | -- | -- | 3 |
| Huguelet<br>1997 (46)                              | 0 | 0 | 0 | 0 | 1 | 1 | 1 | 1  | -- | -- | -- | -- | -- | -- | 3 |
| Karper<br>2008 (47)                                | 0 | 0 | 0 | 0 | 1 | 0 | 1 | 1  | -- | -- | -- | -- | -- | -- | 2 |
| Maples<br>2012 (48)                                | 0 | 0 | 0 | 0 | 1 | 1 | 1 | -- | -- | -- | -- | -- | -- | 1  | 3 |
| Mas-<br>Exposito<br>2015 (49)                      | 1 | 0 | 0 | 0 | 1 | 1 | 1 | -- | 1  | 1  | 1  | -- | -- | 1  | 4 |
| Sendra-<br>Gutierrez<br>2013 (50)                  | 0 | 0 | 0 | 0 | 1 | 1 | 0 | -- | -- | -- | -- | -- | -- | 0  | 2 |





Supplemental Figure 3. Forest plots and Egger test

Psychiatric symptoms

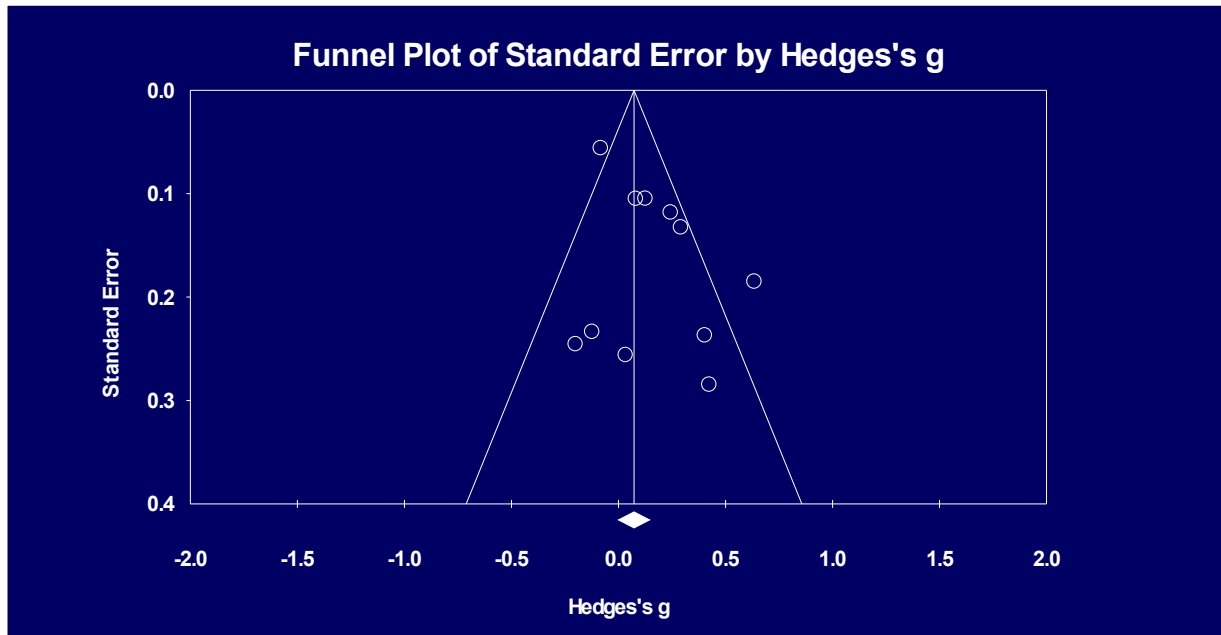

Intercept (95% CI): 1.71 (-0.32, 3.74);  $p=0.09$

Mental QOL

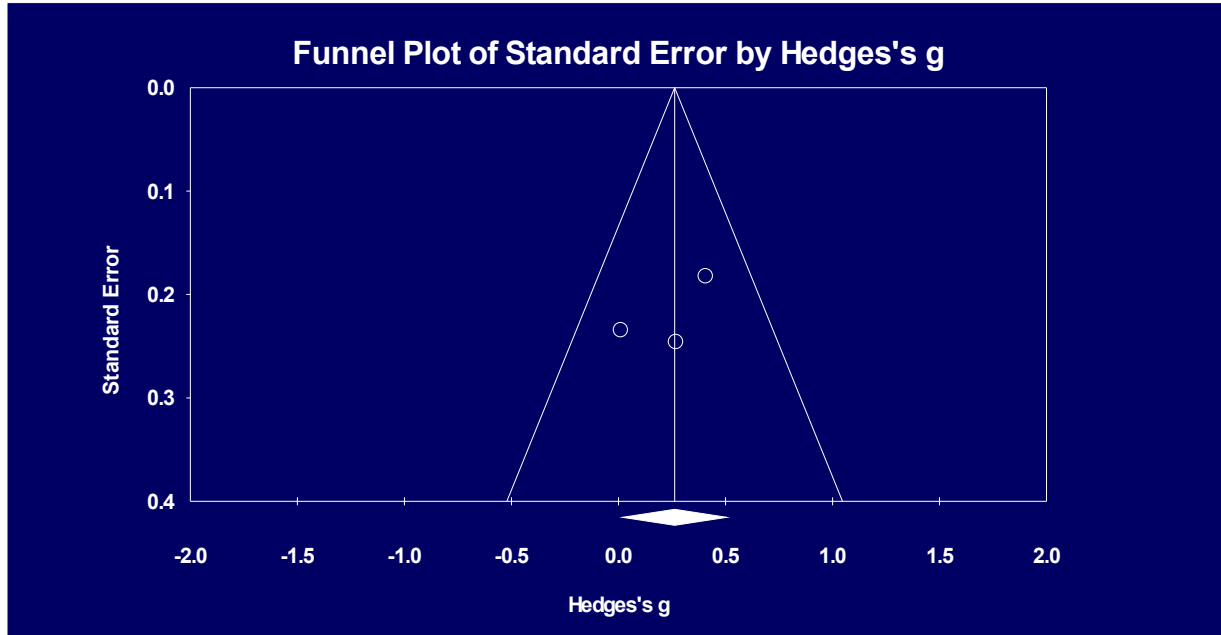

Intercept (95% CI): -4.18 (-53.52, 45.16); p=0.48

## Global QOL

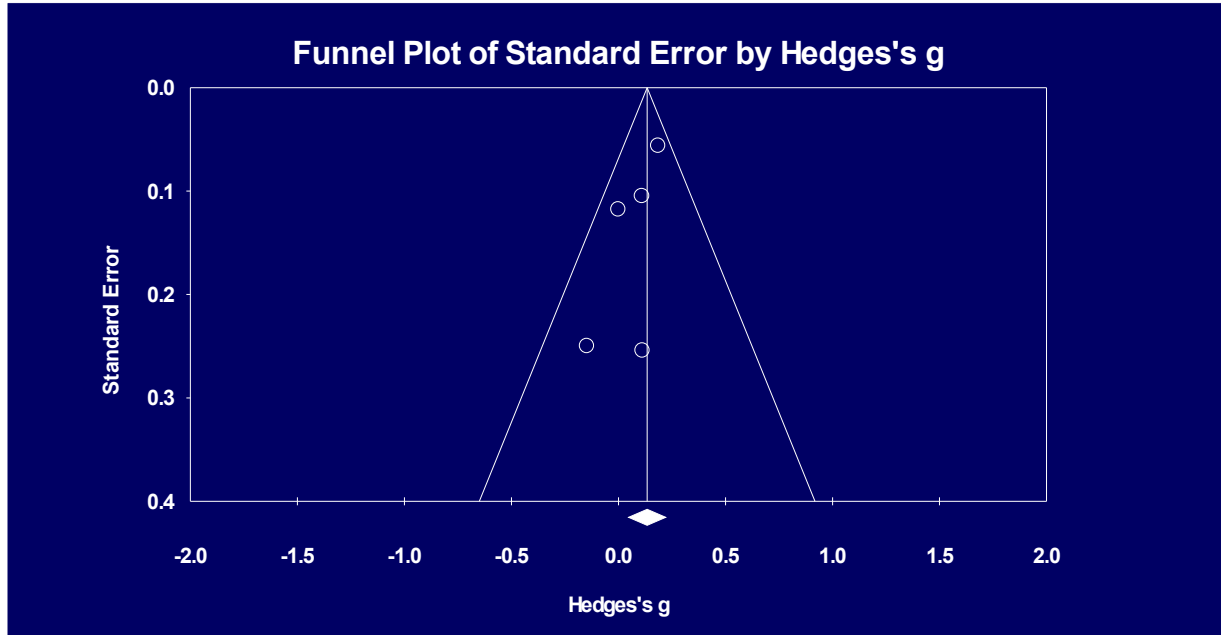

Intercept (95% CI): -1.30 (-3.21, 0.61);  $p=0.12$

Number of inpatient psychiatric hospital days

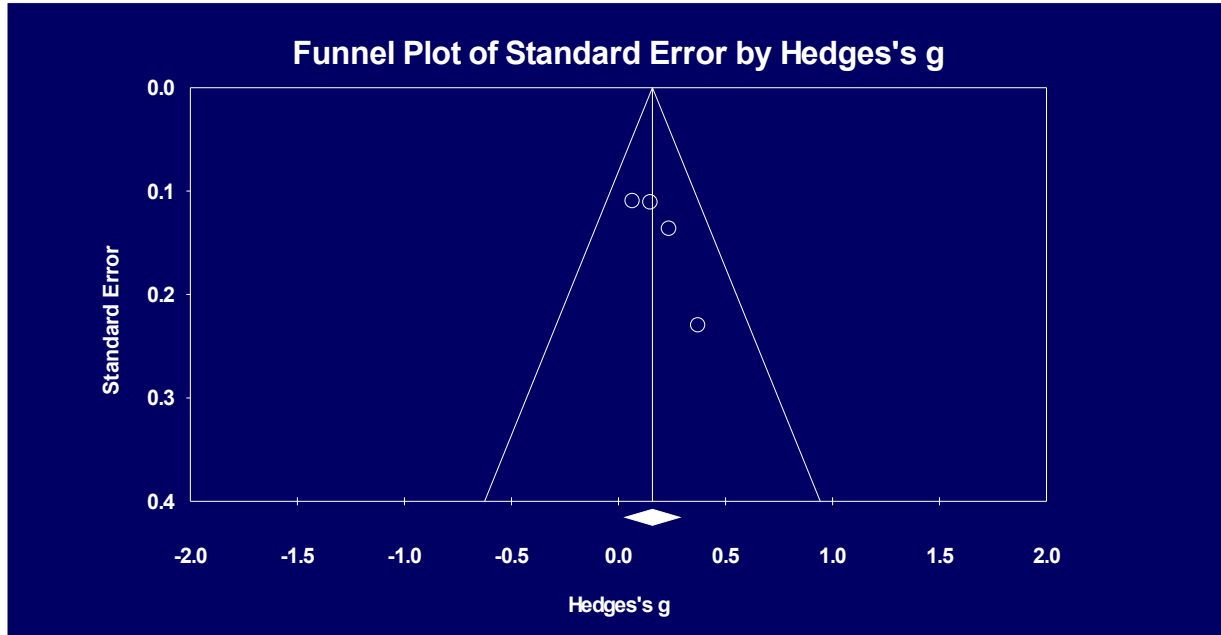

Intercept (95% CI): 2.41 (-1.75, 6.56); p=0.13
